# Supplementary material
Source: publisher figshare collection journal article supplement (https://karger.figshare.com/articles/dataset/_/5124601)
Supplement: Supplementary file 1 [file 1]

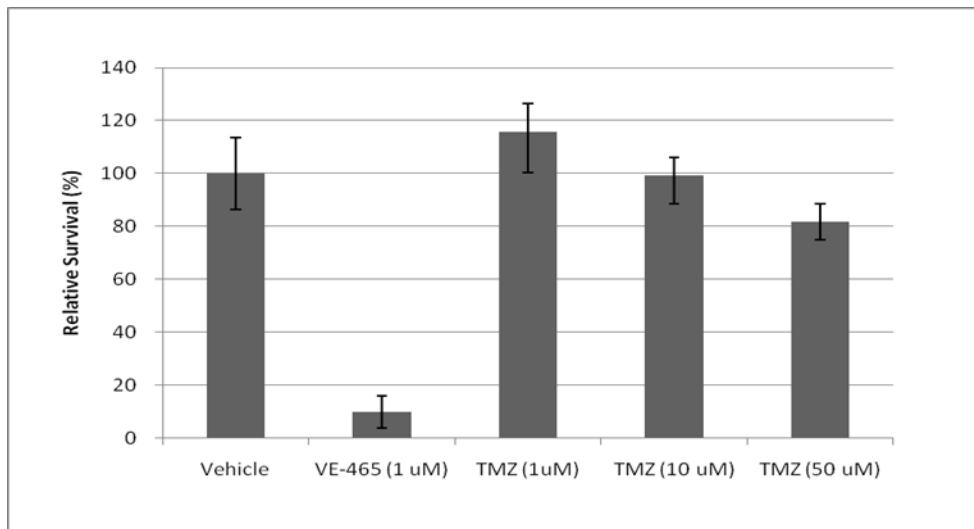

**Supplementary figure 1. Effects of various inhibitors on cell viability in GBM 8401 cells**

GBM 8401 cells were treated with Aurora kinase inhibitor (VE-465) and the standard chemotherapy drug temozolomide (TMZ) at indicated concentrations for 72 hours. The percentage of survival cells was determined using trypan blue staining. Columns: mean and bars: SD

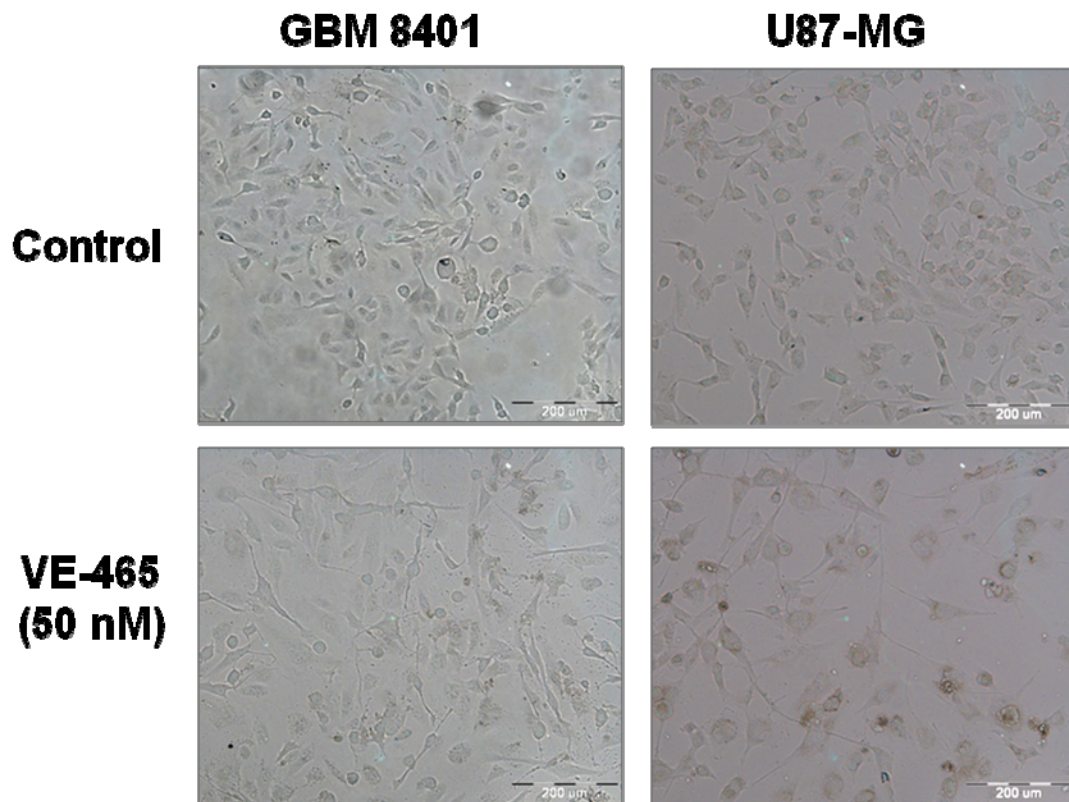

**Supplementary figure 2. VE-465 induces morphology change in GBM cells**

GBM 8401 and U87-MG cells were treated with nM VE465 for 48 hours. The cells increased in size.
