# Supplementary material
Source: publisher figshare collection journal article supplement (https://karger.figshare.com/articles/dataset/_/5124601)
Supplement: Supplementary file 2 [file 1]

**Supplementary table 1. IHC staining for GBM samples (OS=overall survival)**

| IHC staining for GBM samples |     |        |          |            |
|------------------------------|-----|--------|----------|------------|
| Case                         | Age | Gender | Aurora-A | OS (month) |
| 1                            | 30  | M      | 3+       | 23         |
| 2                            | 42  | M      | Negative | 10         |
| 3                            | 45  | F      | Negative | 13         |
| 4                            | 44  | F      | 1+       | 6          |
| 5                            | 72  | F      | 1+       | 5          |
| 6                            | 67  | F      | Negative | 11         |
| 7                            | 61  | M      | Negative | 5          |
| 8                            | 54  | M      | 1+       | 26         |
| 9                            | 47  | F      | Negative | 5          |
| 10                           | 64  | M      | Negative | 15         |
| 11                           | 73  | F      | 2+       | 17         |
| 12                           | 66  | M      | Negative | 14         |
| 13                           | 54  | M      | 1+       | 2          |
| 14                           | 46  | F      | Negative | 0          |
| 15                           | 51  | M      | 1+       | 17         |
| 16                           | 31  | M      | Negative | 3          |
| 17                           | 36  | M      | 3+       | 4          |
| 18                           | 55  | M      | 3+       | 20         |
| 19                           | 71  | F      | Negative | 16         |
| 20                           | 59  | F      | 3+       | 15         |
| 21                           | 80  | M      | 3+       | 22         |
| 22                           | 30  | M      | 1+       | 3          |

**Supplementary table 2. IHC staining for astrocytoma samples (OS=overall survival)**

| IHC staining for astrocytoma samples |     |        |          |            |
|--------------------------------------|-----|--------|----------|------------|
| Case                                 | Age | Gender | Aurora-A | OS (month) |
| 1                                    | 28  | F      | Negative | 19         |
| 2                                    | 48  | F      | Negative | 112        |
| 3                                    | 45  | M      | 2+       | 41         |
| 4                                    | 85  | M      | Negative | 0          |
| 5                                    | 74  | F      | Negative | 89         |
| 6                                    | 47  | F      | 1+       | 17         |
| 7                                    | 68  | M      | Negative | 8          |
| 8                                    | 62  | F      | Negative | 91         |
| 9                                    | 18  | M      | Negative | 58         |
| 10                                   | 30  | M      | Negative | 13         |
